# Supplementary material for: Advances in Lipid and Metal Nanoparticles for Antimicrobial Peptide Delivery
Source: MDPI journal article supplement (doi:10.3390/pharmaceutics11110588), 2019-11-08
Supplement: s1 [file s1]

# Supplementary Materials: Advances in Lipid and Metal Nanoparticles for Antimicrobial Peptide Delivery

Marcin Makowski, Ítala C. Silva, Constança Pais do Amaral, Sónia Gonçalves, Nuno C. Santos

**Table S1.** Clinical trials of AMPs and proposed applications.

| AMP          | Application                                                                                                  | Clinical trial |                |         |         |
|--------------|--------------------------------------------------------------------------------------------------------------|----------------|----------------|---------|---------|
|              |                                                                                                              | Started        | Ended          | Ongoing | Phase   |
| <b>AB103</b> | Efficacy and safety of AB103 in necrotizing soft tissue infections treatment                                 | December 2015  | November 2019  | X       | Phase 3 |
| <b>AB103</b> | Safety, pharmacokinetics and immunomodulatory effects of AB103 in necrotizing soft tissue infection patients | December 2011  | December 2012  |         | Phase 2 |
| <b>C16G2</b> | Safety, microbiology study and tolerability of C16G2 varnish and strip                                       | July 2017      | January 2018   |         | Phase 2 |
| <b>C16G2</b> | Safety and microbiology study of C16G2 in multiple oral gel and/or mouth rinse doses                         | February 2014  | August 2014    |         | Phase 2 |
| <b>C16G2</b> | Safety, microbiology study and pharmacokinetics of single or multiple oral C16G2 gel doses                   | October 2014   | July 2015      |         | Phase 2 |
| <b>C16G2</b> | Evaluation of the safety and microbiology of C16G2                                                           | July 2015      | March 2016     |         | Phase 2 |
| <b>C16G2</b> | Evaluation of the microbiology and safety of C16G2 administration                                            | November 2015  | September 2016 |         | Phase 2 |
| <b>C16G2</b> | Evaluation of the safety and microbiology of C16G2 varnish administered in multiple doses to dental subjects | January 2017   | March 2017     |         | Phase 2 |
| <b>C16G2</b> | Evaluation of the microbiology, safety and tolerability of C16G2 dental strip application                    | February       | April 2017     |         | Phase 2 |

| 2017            |                                                                                                                                                          |                |               |                |
|-----------------|----------------------------------------------------------------------------------------------------------------------------------------------------------|----------------|---------------|----------------|
| <b>Colistin</b> | Colistin-rifampin combination and colistin monotherapy in extensively drug-resistant <i>Acinetobacter baumannii</i>                                      | October 2016   | June 2018     | Not applicable |
| <b>Colistin</b> | Safety and efficacy study of high dose colistin                                                                                                          | May 2014       | October 2016  | Phase 4        |
| <b>Colistin</b> | Combined dry powder tobramycin and nebulized colistin inhalation in cystic fibrosis patients                                                             | March 2014     | November 2016 | Phase 3        |
| <b>Colistin</b> | Aerosolized + intravenous <i>vs.</i> intravenous colistin for ventilator-associated pneumonia due to pandrugs-resistant <i>A. baumannii</i> in neonates  | September 2016 | October 2017  | Phase 3        |
| <b>Colistin</b> | Efficacy and mortality of a loading dose of colistin in critically ill patients                                                                          | April 2014     | December 2018 | Phase 4        |
| <b>Colistin</b> | Optimization dose study on pharmacokinetics and pharmacodynamics of colistin in critically ill patients                                                  | October 2011   | October 2013  | Phase 1        |
| <b>Colistin</b> | Colistin pharmacokinetics in continuous renal replacement therapy                                                                                        | November 2013  | August 2015   | Phase 4        |
| <b>Colistin</b> | Therapy of ventilator-associated tracheobronchitis caused by Gram-negative bacteria with nebulized colistin                                              | December 2015  | December 2017 | Phase 3        |
| <b>Colistin</b> | Detection of colistin-resistant isolates from patients of intensive care units and oncohaematology wards                                                 | July 2019      | July 2021     |                |
| <b>Colistin</b> | Evaluation of the nephro/neurotoxicity in the anti-infectious therapy with inhalative colistin therapy for patients with ventilator-associated pneumonia | September 2013 | December 2015 |                |
| <b>Colistin</b> | Efficacy of ascorbic acid for prevention of colistin-associated nephrotoxicity                                                                           | January 2012   | December 2013 | Phase 3        |
| <b>Colistin</b> | Trial of colistin <i>vs.</i> meropenem in ventilator-associated pneumonia                                                                                | May 2012       | December 2015 | Phase 3        |

|                 |                                                                                                                                                                        |               |               |                |
|-----------------|------------------------------------------------------------------------------------------------------------------------------------------------------------------------|---------------|---------------|----------------|
| <b>Colistin</b> | Usefulness of monitoring plasma levels of colistin and sodium colistimethate in patients with multidrug-resistant Gram-negative bacilli                                | January 2012  | August 2015   | Not applicable |
| <b>Colistin</b> | Multicenter open-label randomized controlled trial to compare colistin alone <i>vs.</i> colistin + meropenem                                                           | March 2013    | February 2017 | Phase 4        |
| <b>Colistin</b> | Colistin and rifampicin for multidrug-resistant <i>Acinetobacter</i>                                                                                                   | November 2008 | October 2011  | Phase 3        |
| <b>Colistin</b> | Colistin <i>vs.</i> colistin + fosfomycin for multidrug-resistant <i>Acinetobacter baumannii</i> infections                                                            | June 2010     | May 2012      | Phase 3        |
| <b>Colistin</b> | Intravenous colistin for pulmonary exacerbations: improving safety and efficacy                                                                                        | August 2016   | July 2021     | Phase 4        |
| <b>Colistin</b> | Effect of aerosolised colistin in ventilator associated pneumonia                                                                                                      | April 2013    | April 2015    | Phase 4        |
| <b>Colistin</b> | Intravenous colistin <i>vs.</i> intravenous colistin + nebulized colistin in ventilator-associated pneumonia due to multidrug-resistant <i>Acinetobacter baumannii</i> | April 2008    | April 2011    | Phase 3        |
| <b>Colistin</b> | Effect of colistin inhalation on ventilator associated pneumonia                                                                                                       | January 2016  | January 2018  | Phase 2/3      |
| <b>Colistin</b> | Colistin + rifampicin in multidrug-resistant <i>P. aeruginosa</i> and <i>A. baumannii</i>                                                                              | June 2010     | August 2012   | Phase 3        |
| <b>Colistin</b> | Colistin pharmacokinetics in critically ill patients during extended dialysis                                                                                          | June 2013     | May 2016      |                |
| <b>Colistin</b> | Renal impairment associated with colistin levels                                                                                                                       | December 2009 | January 2011  |                |
| <b>Colistin</b> | Nebulized colistin for hospital-acquired pneumonia                                                                                                                     | June 2006     |               | Phase 3        |
| <b>Colistin</b> | Effect of different colistin doses on clinical outcome of pediatric cancer patients with Gram-negative bacteria infections                                             | January 2017  | June 2019     | Phase 4        |
| <b>Colistin</b> | Optimizing dosing of colistin for infections resistant to all other antibiotics                                                                                        | June 2008     | August 2015   | Not applicable |

|                 |                                                                                                                                                            |                |                |                |
|-----------------|------------------------------------------------------------------------------------------------------------------------------------------------------------|----------------|----------------|----------------|
| <b>Colistin</b> | Sino-nasal inhalation of colistin in patients with cystic fibrosis and <i>Pseudomonas aeruginosa</i> colonization                                          | December 2009  | April 2012     | Phase 2        |
| <b>Colistin</b> | Aerosolized and intravenous colistin in healthy adults                                                                                                     | August 2013    | May 2017       | Phase 1        |
| <b>Colistin</b> | Impact of plasma levels of colistin in patients with carbapenem resistant <i>Acinetobacter baumannii</i> infection                                         | May 2015       | April 2018     |                |
| <b>Colistin</b> | Efficacy and safety of colistin for therapy of infections caused by extended spectrum- $\beta$ -lactamase-producing <i>K. pneumoniae</i> or <i>E. coli</i> | February 2006  | December 2006  | Phase 3        |
| <b>Colistin</b> | Nebulized and intravenous colistin in ventilator-associated pneumonia                                                                                      | July 2017      | June 2018      | Phase 3        |
| <b>Colistin</b> | Incidence of infection after total knee arthroplasty using an erythromycin and colistin loaded cement or a standard cement                                 | September 2007 | May 2012       | Not applicable |
| <b>Colistin</b> | Evaluation of pharmacokinetics and pharmacodynamics properties of intravenous colistimethate sodium                                                        | September 2013 | June 2019      |                |
| <b>Colistin</b> | Investigate of the drug-drug interaction between multiple doses of RO7033877 and multiple doses of colistin methanesulfonate sodium                        | July 2014      | March 2015     | Phase 1        |
| <b>Colistin</b> | Trial for the treatment of extensively drug-resistant Gram-negative bacilli                                                                                | October 2012   | September 2021 | Phase 3        |
| <b>Colistin</b> | Study of plazomicin compared with colistin in patients with infection due to carbapenem-resistant <i>Enterobacteriaceae</i>                                | September 2014 | September 2016 | Phase 3        |
| <b>Colistin</b> | Study of colistin methanesulfonate sodium                                                                                                                  | October 2010   | December 2010  | Phase 1        |
| <b>Colistin</b> | Eradication of antibiotic-resistant bacteria through antibiotics and fecal bacteriotherapy                                                                 | February 2016  | March 2018     | Phase 2        |
| <b>Colistin</b> | Efficacy, safety and tolerability of aztreonam-avibactam + metronidazole <i>vs.</i> meropenem + colistin for Gram-negative bacteria infections             | April 2018     | September 2021 | Phase 3        |

|                 |                                                                                                                       |               |               |                |
|-----------------|-----------------------------------------------------------------------------------------------------------------------|---------------|---------------|----------------|
| <b>Colistin</b> | Clinical usefulness of therapeutic drug monitoring of colistin in treated patients                                    | January 2016  | December 2017 | Not applicable |
| <b>Colistin</b> | Selective digestive decontamination for eradicating carbapenem-resistant <i>Klebsiella pneumoniae</i> carriage        | January 2013  |               | Phase 4        |
| <b>Colistin</b> | Comparison of 2 treatment regimens for eradication of <i>P. aeruginosa</i> infection in children with cystic fibrosis | August 2001   | May 2011      | Phase 4        |
| <b>Colistin</b> | Microbiologic effect of selective decontamination of the digestive tract with colistin, gentamicin and nystatin       |               |               |                |
| <b>Colistin</b> | Impact of treatment with colistin on multiresistant <i>Acinetobacter baumannii</i> mortality, sensitive to colistin   | January 2010  |               |                |
| <b>Colistin</b> | Population pharmacokinetics study of colistin in patients infected with multiresistant Gram-negative bacteria         | May 2009      |               | Phase 1        |
| <b>Colistin</b> | Tracheobronchitis prevention trial                                                                                    | November 2009 | May 2013      | Not applicable |
| <b>Colistin</b> | Selective digestive decontamination in carriers of carbapenem-resistant <i>Klebsiella pneumoniae</i>                  | November 2008 | July 2010     | Not applicable |
| <b>Colistin</b> | Simplified selective digestive tract decontamination for the prevention of intensive care unit acquired infections    | June 2013     | July 2015     | Phase 2/3      |
| <b>Colistin</b> | Aztreonam for inhalation solution (AZLI) for the treatment of exacerbations of cystic fibrosis                        | November 2016 | July 2019     | Phase 4        |
| <b>Colistin</b> | Assessment of kidney function for drug dosage adjustments in critically ill patients                                  | February 2017 | April 2019    | Not applicable |

|                 |                                                                                                                                                        |              |               |   |                |
|-----------------|--------------------------------------------------------------------------------------------------------------------------------------------------------|--------------|---------------|---|----------------|
| <b>Colistin</b> | Study to evaluate the efficacy and safety of intravenous sulbactam-ETX2514 in the treatment of patients with <i>Acinetobacter baumannii</i> infections | April 2019   | July 2020     | X | Phase 3        |
| <b>Colistin</b> | Antibiotic administration in colorectal cancer surgery decrease in complications and better prognosis                                                  | January 2013 | March 2017    |   | Phase 4        |
| <b>Colistin</b> | Decolonization in haematological malignancies                                                                                                          | January 2017 | December 2017 |   | Phase 4        |
| <b>Colistin</b> | Decontamination of the digestive tract in intensive care unit patients                                                                                 | May 2017     | December 2021 | X | Phase 3        |
| <b>Colistin</b> | Scandinavian cystic fibrosis azithromycin study                                                                                                        | May 2008     | March 2014    |   | Phase 4        |
| <b>Colistin</b> | Antibiotic combination for infections caused by Gram-negative bacteria                                                                                 | January 2015 | December 2015 |   | Phase 2/3      |
| <b>Colistin</b> | Drug monitoring of antibiotics in critical care patients                                                                                               | March 2013   | January 2015  |   |                |
| <b>Colistin</b> | Control of intestinal colonization with fecal microbiota transplantation                                                                               | January 2014 | December 2016 |   | Phase 2/3      |
| <b>Colistin</b> | Pharmacokinetics of aerosolized colimycin in cystic fibrosis                                                                                           | October 2011 |               |   | Phase 1        |
| <b>Colistin</b> | Observational study of patients with drug resistant <i>Acinetobacter baumannii</i>                                                                     | August 2010  | June 2013     |   |                |
| <b>Colistin</b> | Efficacy of intestinal decontamination in patients colonized by carbapenem-resistant <i>Klebsiella pneumoniae</i> and colistin                         | July 2012    | November 2015 |   |                |
| <b>Colistin</b> | 7 vs. 14 days antibiotic therapy for ventilator-associated pneumonia                                                                                   | March 2018   | May 2020      | X | Not applicable |
| <b>Colistin</b> | Evaluation of the role of oral antibiotics in carbapenem-resistant <i>Klebsiella pneumonia</i>                                                         | July 2009    | January 2012  |   | Not applicable |

|                 |                                                                                                                                                                    |               |                |   |                |
|-----------------|--------------------------------------------------------------------------------------------------------------------------------------------------------------------|---------------|----------------|---|----------------|
|                 |                                                                                                                                                                    |               |                |   | ble            |
| <b>Colistin</b> | Cohort study on carbapenem-resistant <i>Klebsiella pneumonia</i>                                                                                                   | June 2018     | July 2019      | X |                |
| <b>Colistin</b> | Evaluation of inhaled antibiotics on bacterial diversity in cystic fibrosis lungs                                                                                  | April 2014    | August 2016    |   |                |
| <b>Colistin</b> | Ecological effects of decolonization in intensive care                                                                                                             | December 2013 | October 2017   |   | Phase 3        |
| <b>Colistin</b> | Pharmacokinetics of antibiotics in renal replacement therapies patients                                                                                            | April 2018    | July 2020      | X |                |
| <b>Colistin</b> | <i>Acinetobacter baumannii</i> -related osteomyelitis characterization                                                                                             | May 2017      | December 2019  | X |                |
| <b>Colistin</b> | Impact of antimicrobials and MIC values on bloodstream infections due to extended-spectrum $\beta$ -lactamase or carbapenemase-producing <i>Enterobacteriaceae</i> | January 2013  | May 2014       |   |                |
| <b>Colistin</b> | Clinical outcomes and global epidemiology                                                                                                                          | July 2007     | June 2017      |   |                |
| <b>Colistin</b> | Pharmacokinetics-pharmacodynamics study of 7 anti-infective agents in the cerebro spinal fluid of brain injured patients with an external ventricular drainage     | July 2018     | October 2020   | X | Phase 1        |
| <b>Colistin</b> | Ventilator-associated pneumonia due to <i>Pseudomonas aeruginosa</i>                                                                                               | March 2018    | July 2020      | X | Phase 3        |
| <b>Colistin</b> | Efficacy of colistimethate sodium inhalation in ventilator-associated pneumonia patients                                                                           | October 2013  | September 2016 |   |                |
| <b>Colistin</b> | Efficacy and safety of colistimethate sodium injection to hospital-acquired pneumonia                                                                              | October 2013  |                |   | Phase 2        |
| <b>Colistin</b> | Efficacy and safety of imipenem + cilastatin/relebactam <i>vs.</i> colistimethate sodium + imipenem + cilastatin in imipenem-resistant bacterial infection         | August 2015   | September 2017 |   | Phase 3        |
| <b>Colistin</b> | Adherence improvement and clinical outcome in cystic fibrosis patients                                                                                             | December 2009 | June 2011      |   | Not applicable |
| <b>Colistin</b> | Decolonization study of <i>Enterobacteriaceae</i> producing $\beta$ -lactamases                                                                                    | June 2009     | August 2012    |   | Phase 4        |

|                   |                                                                                                                                                          |               |                |   |                |
|-------------------|----------------------------------------------------------------------------------------------------------------------------------------------------------|---------------|----------------|---|----------------|
| <b>Colistin</b>   | Expanded quantitative urinary culture <i>vs.</i> standard culture techniques in clinical care                                                            | June 2017     | December 2019  | X | Not applicable |
| <b>Colistin</b>   | Patient response to early switch to oral in osteomyelitis                                                                                                | April 2014    | September 2019 | X | Early Phase 1  |
| <b>Colistin</b>   | Efficacy, safety, and tolerability of aztreonam-avibactam in serious infection by metallo- $\beta$ -lactamase producing Gram-negative bacteria treatment | April 2020    | October 2021   | X | Phase 3        |
| <b>Colistin</b>   | Treatment of non-cystic fibrosis bronchiectasis patients with chronic lung infections with colistimethate sodium                                         | January 2018  | July 2020      | X | Phase 3        |
| <b>Colistin</b>   | Efficacy and safety of inhaled colistimethate sodium in bronchiectasis subjects with chronic <i>Pseudomonas aeruginosa</i> infection                     | June 2017     | July 2020      | X | Phase 3        |
| <b>Colistin</b>   | Gram-negative bacteremia in haematopoietic stem cell transplantation recipients                                                                          | February 2014 | April 2017     |   |                |
| <b>Colistin</b>   | Cost of off-label antibiotics in osteoarticular infections                                                                                               | January 2017  | April 2022     | X |                |
| <b>Colistin</b>   | Usage of tobramycin inhalation powder <i>vs.</i> nebulised tobramycin inhalation solution and nebulised colistimethate                                   | August 2013   | October 2015   |   | Phase 4        |
| <b>Daptomycin</b> | Daptomycin as adjunctive therapy for <i>Staphylococcus aureus</i> bacteremia                                                                             | November 2016 | September 2019 | X | Phase 4        |
| <b>Daptomycin</b> | Daptomycin for antimicrobial prophylaxis in MRSA colonized patients undergoing hip, knee or shoulder arthroplasty                                        | October 2010  | March 2014     |   | Phase 4        |
| <b>Daptomycin</b> | Safety, efficacy, and pharmacokinetics of daptomycin in pediatric subjects with complicated skin and soft tissue infections and bacteremia               | December 2018 | May 2021       |   | Phase 2        |
| <b>Daptomycin</b> | Influence of rifampin co-administration on the pharmacokinetics profile of daptomycin                                                                    | May 2014      | July 2016      |   | Early Phase 1  |
| <b>Daptomycin</b> | The pharmacokinetics/pharmacodynamics of high-dose daptomycin in patients with septic                                                                    | January       | June 2016      |   | Not            |



|                   |                                                                                                                                                   |               |                |                |
|-------------------|---------------------------------------------------------------------------------------------------------------------------------------------------|---------------|----------------|----------------|
|                   | shock                                                                                                                                             | 2015          |                | applicable     |
| <b>Daptomycin</b> | Daptomycin in pediatric patients with bacterial meningitis                                                                                        | April 2012    | June 2018      | Phase 1        |
| <b>Daptomycin</b> | Daptomycin with rifampin for treatment of staphylococcal prosthetic joint infection                                                               | June 2012     | June 2016      | Phase 2        |
| <b>Daptomycin</b> | Pharmacokinetics variability of daptomycin during prolonged therapy for bone and joint infections                                                 | May 2015      | September 2015 |                |
| <b>Daptomycin</b> | Vancomycin <i>vs.</i> daptomycin for the treatment of MRSA bacteremia                                                                             | January 2014  | December 2015  | Phase 2        |
| <b>Daptomycin</b> | Daptomycin pharmacokinetics in children with renal disease                                                                                        | November 2009 | April 2014     | Not applicable |
| <b>Daptomycin</b> | Daptomycin concentration in drainage fluid and blood samples of intensive care unit patients                                                      | October 2016  | March 2019     |                |
| <b>Daptomycin</b> | Daptomycin pharmacokinetics during cardiopulmonary bypass surgery                                                                                 | July 2008     | October 2010   | Phase 3        |
| <b>Daptomycin</b> | Daptomycin pharmacokinetics in infants                                                                                                            | January 2010  | December 2011  | Phase 1        |
| <b>Daptomycin</b> | Daptomycin > 6 mg/kg/day as salvage therapy in patients with complex bone and joint infection                                                     | July 2014     | January 2015   |                |
| <b>Daptomycin</b> | Cerebrospinal fluid pharmacokinetics of daptomycin                                                                                                | May 2010      | May 2011       | Not applicable |
| <b>Daptomycin</b> | Daptomycin in treating neutropenia and fever in cancer patients                                                                                   | December 2006 | October 2008   | Phase 2        |
| <b>Daptomycin</b> | Pharmacokinetics and safety evaluation of daptomycin in children between 2-6 years old with proven or suspected Gram-positive bacteria infections | June 2008     | November 2008  | Phase 1        |

|                   |                                                                                                                                                             |                |                |   |                |
|-------------------|-------------------------------------------------------------------------------------------------------------------------------------------------------------|----------------|----------------|---|----------------|
| <b>Daptomycin</b> | Efficacy and safety of daptomycin with and without combination therapy in <i>S. aureus</i> infective endocarditis                                           | February 2009  | November 2011  |   | Phase 4        |
| <b>Daptomycin</b> | Daptomycin pharmacokinetics in critically ill patients receiving continuous veno-venous hemodialysis                                                        | February 2007  | April 2009     |   | Phase 4        |
| <b>Daptomycin</b> | Daptomycin as an adjuvant agent in the treatment of enterococcal native valve endocarditis                                                                  | September 2006 | October 2008   |   | Phase 4        |
| <b>Daptomycin</b> | Safety and efficacy of daptomycin for the treatment of complicated skin and skin-structure infections                                                       | January 2007   |                |   | Phase 4        |
| <b>Daptomycin</b> | Pharmacokinetics study of intraperitoneal administration of daptomycin in peritoneal infection                                                              | September 2013 | December 2017  |   | Not applicable |
| <b>Daptomycin</b> | Retrospective analysis of nephrotoxicity with daptomycin <i>vs.</i> vancomycin treatments in high risk patients                                             | January 2016   | January 2016   |   |                |
| <b>Daptomycin</b> | Safety and efficacy of daptomycin <i>vs.</i> standard in 1-17 year olds with <i>Staphylococcus aureus</i> bacteremia                                        | November 2012  | January 2016   |   | Phase 4        |
| <b>Daptomycin</b> | Daptomycin in catheter-related <i>Staphylococcus aureus</i> treatment                                                                                       | May 2006       | September 2012 |   | Phase 2        |
| <b>Daptomycin</b> | Application of daptomycin in MRSA infected diabetic foot in comparison to vancomycin treatment                                                              | July 2011      | December 2013  |   | Phase 3        |
| <b>Daptomycin</b> | Daptomycin <i>vs.</i> vancomycin in nosocomial or healthcare-associated MRSA bacteremia treatment                                                           | May 2012       | July 2014      |   | Phase 3        |
| <b>Daptomycin</b> | Daptomycin safety and pharmacokinetics in 3-24 months infants with proven/suspected Gram-positive bacteria infections or receiving prophylactic antibiotics | January 2010   | March 2012     |   | Phase 1        |
| <b>Daptomycin</b> | Daptomycin <i>vs.</i> vancomycin in participants with skin infections due to MRSA                                                                           | September 2011 | October 2012   |   | Phase 4        |
| <b>Daptomycin</b> | Adjunction of daptomycin for pneumococcal meningitis treatment                                                                                              | June 2018      | September 2021 | X | Phase 2        |

|                   |                                                                                                                                                                   |                |              |                |
|-------------------|-------------------------------------------------------------------------------------------------------------------------------------------------------------------|----------------|--------------|----------------|
| <b>Daptomycin</b> | Evaluation of daptomycin given during dialysis and after dialysis                                                                                                 | April 2009     | July 2009    | Phase 1        |
| <b>Daptomycin</b> | Daptomycin as antibiotic prophylaxis of sternal wound infections                                                                                                  | November 2008  | March 2012   | Phase 4        |
| <b>Daptomycin</b> | Daptomycin <i>vs.</i> placebo in patients with neutropenia and fever                                                                                              | April 2011     | April 2013   | Phase 3        |
| <b>Daptomycin</b> | Pharmacokinetics of daptomycin 10 mg/kg in patients with bacteremia, endocarditis or skin soft tissue infections due to Gram-positive bacteria with renal failure | March 2014     |              | Phase 3        |
| <b>Daptomycin</b> | Safety and efficacy of daptomycin in pediatric participants (1 to 17 years-old) with skin and skin structure infections                                           | July 2008      | October 2013 | Phase 4        |
| <b>Daptomycin</b> | Catheter-related Gram-positive bacteria bloodstream infections                                                                                                    | March 2007     |              | Phase 2        |
| <b>Daptomycin</b> | Safety, efficacy, and pharmacokinetics of higher doses of daptomycin and vancomycin in MRSA bacteremia                                                            | September 2008 | October 2010 | Phase 2        |
| <b>Daptomycin</b> | Daptomycin pharmacokinetics in continuous veno-venous hemodiafiltration                                                                                           | February 2010  |              | Phase 2        |
| <b>Daptomycin</b> | Daptomycin pharmacokinetics in healthy subjects                                                                                                                   | February 2009  | March 2009   | Phase 1        |
| <b>Daptomycin</b> | Daptomycin for complicated skin and skin structure infections treatment                                                                                           | May 2012       | July 2013    | Phase 4        |
| <b>Daptomycin</b> | Daptomycin for severe necrotizing soft-tissue infections treatment                                                                                                | June 2005      | May 2008     | Not applicable |
| <b>Daptomycin</b> | Efficacy and safety comparison of daptomycin in elderly patients with complicated skin and skin structure infections                                              | March 2010     | March 2011   | Phase 3        |
| <b>Daptomycin</b> | Safety evaluation of daptomycin in non-infected adults who are on hemodialysis or continuous ambulatory peritoneal dialysis                                       | August 2007    | May 2008     | Phase 1        |
| <b>Daptomycin</b> | Efficacy of daptomycin + fosfomycin <i>vs.</i> daptomycin for MRSA bacteremia treatment                                                                           | December 2013  | January 2018 | Phase 3        |
| <b>Daptomycin</b> | Daptomycin for renal insufficiency and complicated skin and skin structure infections treatment                                                                   | January        | November     | Phase 4        |

|                   |                                                                                                                                  | 2005           | 2006           |           |
|-------------------|----------------------------------------------------------------------------------------------------------------------------------|----------------|----------------|-----------|
| <b>Daptomycin</b> | Daptomycin safety and efficacy compared to active comparator in pediatric participants with acute hematogenous osteomyelitis     | September 2013 | December 2016  | Phase 3   |
| <b>Daptomycin</b> | Daptomycin + meropenem <i>vs.</i> ceftazidime in the treatment of nosocomial spontaneous bacterial peritonitis                   | October 2010   | July 2014      | Phase 2/3 |
| <b>Daptomycin</b> | Real-world daptomycin use in Chinese intensive care units                                                                        | June 2018      | December 2021  | X         |
| <b>Daptomycin</b> | Cubicin comparison with vancomycin in complicated skin and skin structure infections in a home infusion setting treatment        | July 2010      | November 2011  | Phase 4   |
| <b>Daptomycin</b> | Daptomycin for antimicrobial prophylaxis                                                                                         | January 2008   | September 2008 | Phase 4   |
| <b>Daptomycin</b> | Cubicin for complicated post-surgical wound infections                                                                           | June 2004      | March 2005     | Phase 4   |
| <b>Daptomycin</b> | Daptomycin safety and efficacy <i>vs.</i> vancomycin or teicoplanin for complicated skin and skin structure infections treatment | April 2006     |                | Phase 3   |
| <b>Daptomycin</b> | Daptomycin for infective endocarditis or to <i>S. aureus</i> bacteremia treatment                                                | March 2002     | February 2005  | Phase 3   |
| <b>Daptomycin</b> | Study comparing CUBICIN® (daptomycin for injection) with vancomycin in cellulitis or erysipelas                                  | February 2006  | August 2006    | Phase 4   |
| <b>Daptomycin</b> | Collection of daptomycin pharmacokinetics samples in patients with renal failure                                                 | March 2008     | December 2010  |           |
| <b>Daptomycin</b> | Daptomycin and cytokines production effects in comparison with vancomycin                                                        | July 2012      | March 2015     | Phase 4   |
| <b>Daptomycin</b> | Daptomycin safety and efficacy for complicated skin and skin structure infections and bacteremia in renal impairment             | April 2010     | June 2012      | Phase 4   |
| <b>Daptomycin</b> | Vancomycin and daptomycin + cefazolin for preoperative vascular surgery prophylaxis                                              | August 2007    | August 2010    | Phase 4   |
| <b>Daptomycin</b> | Outpatient treatment of Gram-positive bacteria wound infections in diabetic foot comparing                                       | August         | August         | Phase 4   |

|                   |                                                                                                                                      |                |                |           |
|-------------------|--------------------------------------------------------------------------------------------------------------------------------------|----------------|----------------|-----------|
|                   | daptomycin <i>vs.</i> vancomycin based regimens                                                                                      | 2010           | 2012           |           |
| <b>Daptomycin</b> | Comparative study of daptomycin to ceftriaxone in moderate to severe community-acquired acute bacterial pneumonia treatment          | October 2000   | September 2001 | Phase 3   |
| <b>Daptomycin</b> | Single-dose daptomycin in pediatric patients with Gram-positive bacteria infection for which they are receiving standard antibiotics | August 2005    | August 2006    | Phase 1   |
| <b>Daptomycin</b> | Daptomycin for Gram-positive bacteria infections treatment                                                                           | December 2002  | January 2004   | Phase 3   |
| <b>Daptomycin</b> | Efficacy and safety study of brilacidin to treat serious skin infections                                                             | February 2014  | October 2014   | Phase 2   |
| <b>Daptomycin</b> | Clinical evaluation of daptomycin bone penetration                                                                                   | May 2011       | November 2015  |           |
| <b>Daptomycin</b> | Daptomycin pharmacokinetics in critically ill patients undergoing continuous veno-venous hemodiafiltration                           | December 2009  | March 2010     | Phase 2   |
| <b>Daptomycin</b> | Daptomycin in subjects undergoing surgery for osteomyelitis associated with an infected prosthetic caused by Staphylococci           | June 2007      | June 2010      | Phase 2   |
| <b>Daptomycin</b> | Population pharmacokinetics analysis of daptomycin in patients with osteoarticular infections                                        | December 2016  | June 2017      |           |
| <b>Daptomycin</b> | China registration study in patients with skin infections                                                                            | September 2008 | September 2010 | Phase 3   |
| <b>Daptomycin</b> | Retrospective evaluation of safety and efficacy of daptomycin used in patients with serious Gram-positive bacteria infections        | February 2011  | April 2011     |           |
| <b>Daptomycin</b> | Safety and efficacy study of daptomycin in complicated skin and skin structure infections                                            | January 2007   | September 2007 | Phase 2   |
| <b>Daptomycin</b> | Vancomycin <i>vs.</i> daptomycin for the treatment of MRSA bacteremia due to isolates with high vancomycin MICs                      | June 2011      | January 2012   | Phase 4   |
| <b>Daptomycin</b> | Ceftobiprole in the treatment of patients with <i>Staphylococcus aureus</i> bacteremia                                               | June 2018      | August         | X Phase 3 |

|                   |                                                                                                                                                    |                |               |         |
|-------------------|----------------------------------------------------------------------------------------------------------------------------------------------------|----------------|---------------|---------|
|                   |                                                                                                                                                    |                | 2021          |         |
| <b>Daptomycin</b> | Study of daptomycin to ceftriaxone in the treatment of moderate to severe community-acquired acute bacterial pneumonia due to <i>S. pneumoniae</i> | July 2001      | February 2002 | Phase 3 |
| <b>Daptomycin</b> | IL-10 stratifying tool towards antibiotic selection for MRSA                                                                                       | November 2015  | January 2018  | Phase 4 |
| <b>Daptomycin</b> | Clinical data collection in Chinese patients received CUBICIN treatment for actual usage in clinical practice                                      | January 2011   | November 2012 |         |
| <b>Daptomycin</b> | Study of MK-3009 in Japanese patients with skin or blood stream infections caused by MRSA                                                          | September 2008 | February 2010 | Phase 3 |
| <b>Daptomycin</b> | Initial treatment for acute bacterial skin infections caused by <i>Staphylococcus aureus</i>                                                       | October 2010   | March 2012    | Phase 2 |
| <b>Daptomycin</b> | Vascular surgical antibiotic prophylaxis study                                                                                                     | May 2011       | October 2013  | Phase 4 |
| <b>Daptomycin</b> | Safety and efficacy of ceftaroline in subjects with <i>Staphylococcus aureus</i> bacteremia or with persistent MRSA bacteremia                     | January 2013   | July 2014     | Phase 4 |
| <b>Daptomycin</b> | Telavancin <i>Staphylococcus aureus</i> bacteremia trial                                                                                           | December 2014  | April 2018    | Phase 3 |
| <b>Daptomycin</b> | Retrospective evaluation of safety and efficacy of daptomycin used in patients with serious Gram-positive bacteria infections                      | February 2011  |               |         |
| <b>Daptomycin</b> | Concentration of antimicrobials in catheter-lock solutions                                                                                         | May 2012       | December 2015 | Phase 4 |
| <b>Daptomycin</b> | Antibiotic plasma concentrations during continuous renal replacement therapy with a high adsorption membrane                                       | August 2019    | December 2022 | X       |
| <b>Daptomycin</b> | Combinational antibiotic therapy for MRSA infection                                                                                                | August 2015    | October 2018  | Phase 3 |
| <b>Daptomycin</b> | Safety and efficacy of drug-induced nephrotoxicity in high-risk patients prevention                                                                | October        |               | Phase 4 |

|                      |                                                                                                                                                                      |               |                |   |                |
|----------------------|----------------------------------------------------------------------------------------------------------------------------------------------------------------------|---------------|----------------|---|----------------|
|                      |                                                                                                                                                                      | 2011          |                |   |                |
| <b>Daptomycin</b>    | Dalbavancin for Gram-positive bacteria osteoarticular infections treatment                                                                                           | January 2018  | January 2021   | X | Phase 4        |
| <b>Daptomycin</b>    | Acute renal failure in surgical intensive care units                                                                                                                 | July 2006     | December 2012  |   | Not applicable |
| <b>Daptomycin</b>    | <i>Staphylococcus aureus</i> bacteremia antibiotic treatment options                                                                                                 | December 2013 | October 2019   | X | Phase 3        |
| <b>Daptomycin</b>    | Study of MRSA isolated from infected patients in Brazil                                                                                                              | July 2011     |                |   |                |
| <b>Daptomycin</b>    | Efficacy of oral antibiotic therapy compared to intravenous antibiotic therapy for osteomyelitis                                                                     | March 2014    | February 2017  |   | Phase 2        |
| <b>Daptomycin</b>    | Off-label antibiotics cost in osteoarticular infections                                                                                                              | January 2017  | April 2022     | X |                |
| <b>Daptomycin</b>    | Infection control in high risk patients of developing <i>Clostridium difficile</i> infection, vancomycin-resistant enterococci or multidrug-resistant Gram-negatives | November 2016 | December 2020  | X |                |
| <b>DPK-060</b>       | Clinical safety and efficacy of DPK-060 in acute external otitis patients                                                                                            | November 2011 | November 2012  |   | Phase 2        |
| <b>DPK-060</b>       | Investigation of the antimicrobial efficacy and safety of DPK-060 topical application                                                                                | March 2008    | April 2009     |   | Phase1/2       |
| <b>Friulimicin B</b> | Friulimicin B human trial                                                                                                                                            | June 2007     | September 2007 |   | Phase 1        |
| <b>Friulimicin B</b> | Pharmacokinetics/pharmacodynamics of EA-230 during endotoxemia                                                                                                       | February 2015 | December 2015  |   | Phase 1        |
| <b>Friulimicin B</b> | Immunomodulation of EA-230 following on-pump coronary artery bypass grafting                                                                                         | June 2016     | October 2018   |   | Phase 2        |
| <b>hLF-1</b>         | Safety of a single dose of hLF1-11 to autologous haematopoietic stem cell transplant recipients                                                                      | March 2006    | November       |   | Phase          |

|                 |                                                                                                                       |                |               |   |               |
|-----------------|-----------------------------------------------------------------------------------------------------------------------|----------------|---------------|---|---------------|
|                 |                                                                                                                       |                | 2006          |   | 1/ 2          |
| <b>Isegaran</b> | Isegaran in ventilator-associated pneumonia prevention                                                                | September 2003 | June 2004     |   | Phase2/ 3     |
| <b>Isegaran</b> | Isegaran hydrochloride in oral mucositis prevention in patients undergoing radiation therapy for head and neck cancer | December 2000  |               |   | Phase 3       |
| <b>LL-37</b>    | Intratumoral injection of LL-37 for melanoma                                                                          | July 2015      | July 2021     | X | Phase 1/2     |
| <b>LL-37</b>    | Effect of smoking and vitamin D <sub>3</sub> on human cathelicidin peptide LL-37 levels                               | December 2011  | July 2015     |   |               |
| <b>LL-37</b>    | Passive smoking and LL-37 in children                                                                                 | November 2016  | June 2018     |   |               |
| <b>LL-37</b>    | Evaluation of the inhibitory effects of topical ivermectin on markers of Rosacea-specific inflammation                | July 2016      | August 2019   |   | Phase 1/2     |
| <b>LL-37</b>    | High dose preoperative cholecalciferol supplementation and perioperative vitamin D status                             | January 2013   | May 2015      |   | Phase 3       |
| <b>LL-37</b>    | Effects of aminocaproic acid on Rosacea-specific inflammation                                                         | July 2011      | December 2012 |   | Early Phase 1 |
| <b>LL-37</b>    | Effect of high-dose vitamin D <sub>3</sub> in smokers and non-smokers with and without HIV                            | April 2018     | June 2020     | X | Phase 1       |
| <b>LL-37</b>    | Comparison of cathelicidin expression in skin and saliva in atopic dermatitis and psoriasis patients                  | July 2005      | February 2009 |   |               |
| <b>LL-37</b>    | Therapeutic induction of endogenous antibiotics                                                                       | January 2005   | January 2009  |   | Phase 2       |
| <b>LL-37</b>    | Phenylbutyrate and vitamin D in tuberculosis                                                                          | December 2010  | December 2014 |   | Phase 2       |
| <b>LL-37</b>    | Effects of surfactants on the innate immune system                                                                    | September 2013 | December 2015 |   | Not applica   |



|       |                                                                                                       |                |                |   |                |
|-------|-------------------------------------------------------------------------------------------------------|----------------|----------------|---|----------------|
|       |                                                                                                       |                |                |   | ble            |
| LL-37 | Calcitriol <i>vs.</i> placebo among critically-ill patients with sepsis                               | February 2013  | February 2014  |   | Phase 2        |
| LL-37 | Effects of vitamin D supplementation on lung function in cystic fibrosis                              | October 2008   | September 2010 |   | Not applicable |
| LL-37 | Effects of vitamin D and omega-3 lipids on infectious diseases and hCAP18                             | July 2010      | December 2019  | X | Not applicable |
| LL-37 | Cholecalciferol supplementation for sepsis in the intensive care unit                                 | January 2014   | December 2014  |   | Phase 3        |
| LL-37 | Fermented milk on the appearance of common winter infectious diseases                                 | December 2014  | June 2015      |   | Phase 2        |
| LL-37 | Exploratory pharmacodynamics study of HP802-247 in venous leg ulcers                                  | July 2014      | October 2015   |   | Phase 2        |
| LL-37 | cAMP (cyclic adenosine monophosphate) levels in the nose                                              | March 2011     | December 2012  |   | Not applicable |
| LL-37 | Vitamin D in ventilated intensive care unit patients                                                  | July 2011      | April 2014     |   | Phase 2        |
| LL-37 | Effects of <i>Lactobacillus reuteri</i> and vitamin D <sub>3</sub> in children with atopic dermatitis | February 2015  | February 2018  |   | Not applicable |
| LL-37 | Immune reconstitution in HIV disease                                                                  | September 2012 | August 2015    |   | Phase 2        |
| LL-37 | Immune reconstitution in tuberculosis disease                                                         | September 2012 | August 2015    |   | Phase 2        |

|                |                                                                                                                                      |                |               |   |                |
|----------------|--------------------------------------------------------------------------------------------------------------------------------------|----------------|---------------|---|----------------|
| <b>LL-37</b>   | Evaluation of rosacea-related inflammatory markers in adult skin when treated with LL-37 <i>vs.</i> placebo                          | April 2011     | August 2012   |   | Phase 4        |
| <b>LL-37</b>   | Evaluation of bifidobacterium BB-12® efficacy in the treatment of infantile colic                                                    | November 2016  | November 2017 |   | Not applicable |
| <b>LL-37</b>   | Safety, tolerability, pharmacokinetics, pharmacodynamics and food effect of single or repeat doses of GSK2793660 in healthy subjects | January 2014   | October 2014  |   | Phase 1        |
| <b>LL-37</b>   | Effects of Antarctic environment on vitamin D status and health risk biomarkers                                                      | October 2016   | March 2018    |   | Not applicable |
| <b>LL-37</b>   | Antenatal vitamin D <sub>3</sub> dose-finding and safety study                                                                       | July 2009      | June 2010     |   | Phase 1        |
| <b>LL-37</b>   | Etiology of eczema herpeticum                                                                                                        | February 2017  | June 2020     | X |                |
| <b>LL-37</b>   | Cellular immunotherapy for septic shock                                                                                              | March 2018     | October 2020  | X | Phase 2        |
| <b>LL-37</b>   | Effects of vitamin D supplementation on aerobic fitness in athletes                                                                  | October 2014   | April 2015    |   | Phase 4        |
| <b>LL-37</b>   | Efficacy of vitamin D supplementation to MRSA carriers                                                                               | December 2014  | December 2017 |   | Phase 2        |
| <b>LTX-109</b> | Efficacy and safety of two doses of LTX-109 in impetigo                                                                              | February 2013  | April 2014    |   | Phase 2        |
| <b>LTX-109</b> | Safety, tolerability and efficacy of topical LTX-109 in nasal MRSA/MSSA                                                              | May 2010       | April 2011    |   | Phase 1/2      |
| <b>LTX-109</b> | Safety, tolerability and efficacy of LTX-109 on uncomplicated Gram-positive bacteria skin infection                                  | September 2010 | February 2011 |   | Phase 2        |
| <b>MSI-78</b>  | MSI-78 for topical application <i>vs.</i> oral ofloxacin in infected diabetic ulcers treatment                                       | August         | July 1996     |   | Phase 3        |

|                 |                                                                                                                                    |                |               |   |                |
|-----------------|------------------------------------------------------------------------------------------------------------------------------------|----------------|---------------|---|----------------|
|                 |                                                                                                                                    | 1994           |               |   |                |
| <b>MSI-78</b>   | MSI-78 for topical application <i>vs.</i> oral ofloxacin in infected diabetic ulcers treatment                                     | August 1994    | July 1996     |   | Phase 3        |
| <b>Nisin</b>    | Inhibition effects of probiotics on pathogens associated with ventilator-associated pneumonia                                      | November 2016  | January 2018  |   |                |
| <b>Nisin</b>    | Functional ingredients: effect in gastrointestinal system                                                                          | April 2012     | December 2012 |   | Not applicable |
| <b>Omiganan</b> | Twice a day omiganan in facial seborrheic dermatitis patients                                                                      | October 2018   | December 2019 | X | Phase 2        |
| <b>Omiganan</b> | Evaluation of long-term safety of a once-daily omiganan topical gel                                                                | September 2015 | February 2018 |   | Phase 3        |
| <b>Omiganan</b> | Antimicrobial activity of omiganan 1% gel <i>vs.</i> chlorhexidine 2% for topical skin antisepsis in healthy adult subjects        | May 2008       | June 2008     |   | Phase 3        |
| <b>Omiganan</b> | Pharmacodynamics of omiganan BID in patients with atopic dermatitis                                                                | March 2017     | December 2017 |   | Phase 2        |
| <b>Omiganan</b> | Pharmacodynamics, safety and efficacy of topical omiganan in patients with external genital warts                                  | July 2016      | March 2017    |   | Phase 2        |
| <b>Omiganan</b> | Pharmacodynamics, safety/tolerability and efficacy of topical omiganan in patients with vulvar intraepithelial neoplasia           | November 2015  | July 2017     |   | Phase 2        |
| <b>Omiganan</b> | Omiganan 1% gel preventing catheter infections/colonization in patients with central venous catheters                              | August 2005    | July 2008     |   | Phase 3        |
| <b>Omiganan</b> | Topical challenge with omiganan and imiquimod in healthy volunteers                                                                | February 2017  | March 2017    |   | Phase 1        |
| <b>Omiganan</b> | Safety and efficacy evaluation of omiganan topical gel <i>vs.</i> vehicle in female subjects with moderate to severe acne vulgaris | October 2015   | August 2016   |   | Phase 2        |

|                  |                                                                                                                                 |                |                |         |
|------------------|---------------------------------------------------------------------------------------------------------------------------------|----------------|----------------|---------|
| <b>Omiganan</b>  | Pharmacodynamics of omiganan in atopic dermatitis patients                                                                      | May 2015       | November 2015  | Phase 2 |
| <b>Omiganan</b>  | A twelve week safety and efficacy study in Rosacea                                                                              | March 2013     |                | Phase 2 |
| <b>Omiganan</b>  | Safety and efficacy evaluation of a once-daily topical gel <i>vs.</i> vehicle                                                   | October 2015   | April 2018     | Phase 3 |
| <b>Omiganan</b>  | Safety and efficacy evaluation of a once-daily topical gel <i>vs.</i> vehicle                                                   | October 2015   | September 2017 | Phase 3 |
| <b>Omiganan</b>  | Safety and efficacy of MBI 226 for central venous catheter-related bloodstream infections prevention                            | September 2000 | July 2003      | Phase 3 |
| <b>Omiganan</b>  | Safety and efficacy of MBI 226 1.25% and 2.5% topical acne solutions in acne treatment                                          | January 2003   | September 2003 | Phase 2 |
| <b>Omiganan</b>  | Safety and efficacy of MBI 226 1.25% and 5% topical acne solutions in acne treatment                                            | October 2000   | September 2001 | Phase 2 |
| <b>PAC113</b>    | PAC113 mouthrinse in HIV seropositive individuals with oral candidiasis                                                         | January 2008   | June 2008      | Phase 2 |
| <b>Pexiganan</b> | Pexiganan <i>vs.</i> placebo for mild infections of diabetic foot ulcers treatment                                              | June 2014      | July 2016      | Phase 3 |
| <b>Pexiganan</b> | Pexiganan <i>vs.</i> placebo control for the treatment of mild infections of diabetic foot ulcers                               | June 2014      | August 2016    | Phase 3 |
| <b>POL7080</b>   | POL7080 pharmacokinetics, safety and efficacy in ventilator-associated <i>Pseudomonas aeruginosa</i> pneumonia patients         | October 2013   | December 2016  | Phase 2 |
| <b>POL7080</b>   | POL7080 pharmacokinetics / pharmacodynamics, safety and efficacy in exacerbation of non-cystic fibrosis bronchiectasis patients | December 2013  | November 2015  | Phase 2 |
| <b>POL7080</b>   | POL7080 pharmacokinetics and safety in renal impairment patients                                                                | April 2013     | July 2015      | Phase 1 |
| <b>POL7080</b>   | Interaction between amikacin and POL7080                                                                                        | April 2016     | December 2016  | Phase 1 |
| <b>POL7080</b>   | Nosocomial pneumonia suspected or confirmed due to <i>Pseudomonas</i>                                                           | October        | December       | Phase 3 |

|                    |                                                                                                                             | 2018          | 2021          |   |                |
|--------------------|-----------------------------------------------------------------------------------------------------------------------------|---------------|---------------|---|----------------|
| <b>POL7080</b>     | Suspected or confirmed ventilator-associated pneumonia due to <i>Pseudomonas aeruginosa</i>                                 | March 2018    | July 2020     |   | Phase 3        |
| <b>Polymyxin B</b> | Efficacy of polymyxin B against infections caused by extensively drug-resistant Gram-negative bacteria                      | December 2014 | November 2015 |   | Phase 4        |
| <b>Polymyxin B</b> | Polymyxin B monotherapy <i>vs.</i> combination in critically ill patients with multidrug-resistant pathogens                | May 2017      | December 2019 | X | Phase 3        |
| <b>Polymyxin B</b> | Melatonin for renal protection in patients receiving polymyxin B                                                            | October 2018  | July 2020     | X | Phase 2        |
| <b>Polymyxin B</b> | Optimizing clinical use of polymyxin B                                                                                      | February 2016 | May 2020      | X |                |
| <b>Polymyxin B</b> | Impact of early peri-operative use of polymyxin B hemoperfusion in septic patients undergoing emergent abdominal surgery    | January 2012  | February 2015 |   | Not applicable |
| <b>Polymyxin B</b> | The effects of polymyxin B protects on sepsis induced kidney dysfunction: a randomized clinical trial                       | May 2006      | December 2007 |   | Phase 3        |
| <b>Polymyxin B</b> | Safety and efficacy of heparin dosing score protocol for polymyxin B hemoperfusion                                          | May 2017      | July 2017     |   |                |
| <b>Polymyxin B</b> | The pilot study of the efficacy of polymyxin B hemoperfusion in critically ill patients with severe sepsis                  | January 2015  | August 2017   |   | Not applicable |
| <b>Polymyxin B</b> | Efficacy of polymyxin B hemoperfusion on severe sepsis secondary to pneumonia or urinary tract infection                    | August 2016   | March 2019    |   | Not applicable |
| <b>Polymyxin B</b> | Randomized-controlled trial on combination antibiotic for infections caused by Gram-negative bacteria                       | January 2015  | December 2015 |   | Phase 2/3      |
| <b>Polymyxin B</b> | Effectiveness of polymyxin B sulphate + prednisolone + benzocaine + clioquinol in acute and sub-acute dermatitis eczematous | May 2012      | August 2012   |   | Phase 3        |

|                    |                                                                                                                      |                |               |   |                |
|--------------------|----------------------------------------------------------------------------------------------------------------------|----------------|---------------|---|----------------|
| <b>Polymyxin B</b> | Polyethyleneimine-coated membrane for hemofiltration <i>vs.</i> polymyxin B-immobilized fibre column in septic shock | August 2013    | July 2019     |   | Not applicable |
| <b>Polymyxin B</b> | Early use of polymyxin B hemoperfusion in abdominal sepsis                                                           | December 2004  | April 2008    |   | Phase 4        |
| <b>Polymyxin B</b> | Open-label evaluation of polymyxin B hemoperfusion for septic shock                                                  |                |               |   |                |
| <b>Polymyxin B</b> | Effects of hemoperfusion with a polymyxin B membrane in peritonitis with septic shock                                | October 2010   | December 2013 |   | Phase 3        |
| <b>Polymyxin B</b> | Safety and efficacy of polymyxin B hemoperfusion for septic shock                                                    | June 2010      | June 2017     |   | Not applicable |
| <b>Polymyxin B</b> | Gut decontamination in pediatric allogeneic hematopoietic stem cell transplantation                                  | March 2016     | May 2023      |   | Phase 2        |
| <b>Polymyxin B</b> | Antibiotic irrigation for pancreatoduodenectomy                                                                      | November 2014  | August 2024   | X | Not applicable |
| <b>Polymyxin B</b> | Efficacy Maxinom® and Maxitrol® in reducing the signs and symptoms of acute bacterial conjunctivitis                 | February 2011  |               |   | Phase 3        |
| <b>Polymyxin B</b> | Comparison of combination antibiotics eyedrop to artificial tear in hordeolum after incision and curettage           | September 2007 | December 2008 |   | Phase 3        |
| <b>Polymyxin B</b> | Endotoxin adsorber hemoperfusion and microcirculation                                                                | December 2012  | June 2019     |   | Not applicable |
| <b>Polymyxin B</b> | Safety and efficacy of polymyxin B hemoperfusion for endotoxemic septic shock                                        | July 2019      | December 2021 |   | Not applicable |
| <b>Polymyxin B</b> | Clearance of nasal <i>Staphylococcus aureus</i> with triple antibiotic ointment                                      | September      | November      |   | Not            |

|                    |                                                                                                                         |                |               |   |                |
|--------------------|-------------------------------------------------------------------------------------------------------------------------|----------------|---------------|---|----------------|
|                    |                                                                                                                         | 2009           | 2010          |   | applicable     |
| <b>Polymyxin B</b> | Safety evaluation and immunogenicity of monovalent oral polio vaccine type 2 in children aged 1 to 5 years in Lithuania | November 2015  | December 2016 |   | Phase 4        |
| <b>Polymyxin B</b> | The combined antibiotic therapy for carbapenem resistant <i>Klebsiella pneumoniae</i>                                   | January 2019   | December 2020 | X | Early Phase 1  |
| <b>Polymyxin B</b> | Treatment of acyclovir-resistant mucocutaneous <i>Herpes simplex</i> disease in patients with AIDS                      |                | April 1992    |   | Not applicable |
| <b>Polymyxin B</b> | Efficacy of POLYGYNAX® in the empirical treatment of infectious vaginitis                                               | September 2015 | August 2016   |   | Phase 3        |
| <b>Polymyxin B</b> | Safety and efficacy study of polymyxin B for congenital nasolacrimal duct obstruction in children treatment             | September 2011 | June 2014     |   | Phase 1        |
| <b>Polymyxin B</b> | Ear comfort ear drops to treat acute otitis externa cases compared to DexOtic® and Otidin®                              | July 2011      | December 2013 |   | Phase 2        |
| <b>Polymyxin B</b> | Effect of systemic oxygen on corneal epithelial wound healing in diabetic patients undergoing pars plana vitrectomy     | October 2013   | October 2014  |   | Not applicable |
| <b>Polymyxin B</b> | The effect of glaucoma drops on the duration of a pure intraocular gas bubble                                           | June 2011      | April 2013    |   | Not applicable |
| <b>Polymyxin B</b> | Efficacy and safety study of CA330 hemoabsorption device on IL-6 removal in septic patients                             | December 2018  | October 2020  | X | Not applicable |
| <b>Polymyxin B</b> | Moxifloxacin <i>vs.</i> Polytrim® for conjunctivitis                                                                    | March 2007     | March 2012    |   | Phase 4        |
| <b>Polymyxin B</b> | Intravitreal carboplatin for the treatment of participants with recurrent or refractory intraocular                     | November       | December      | X | Phase 1        |

|                    |                                                                                                                                                                    |                |                |   |                |
|--------------------|--------------------------------------------------------------------------------------------------------------------------------------------------------------------|----------------|----------------|---|----------------|
|                    | retinoblastoma                                                                                                                                                     | 2016           | 2024           |   |                |
| <b>Polymyxin B</b> | Comparison between bandage contact lens and pressure patching for the erosion area and pain scale in corneal erosion patients                                      | September 2012 | February 2013  |   | Phase 3        |
| <b>Polymyxin B</b> | Perioperative antibiotic therapy to prevent cardiac implantable electronic device infections                                                                       | April 2016     | August 2020    | X | Phase 3        |
| <b>Polymyxin B</b> | Alcohol 20% for separation of pterygium and comparison of different wound closure methods                                                                          | June 2008      | July 2010      |   | Not applicable |
| <b>Polymyxin B</b> | Frozen <i>vs.</i> fresh corneal carriers for the Boston KPro type I donor carriers                                                                                 | September 2013 | January 2020   | X | Not applicable |
| <b>Polymyxin B</b> | Efficacy, safety and tolerability of aztreonam-avibactam in the treatment of serious infection due to metallo- $\beta$ -lactamase-producing Gram-negative bacteria | April 2020     | October 2021   | X | Phase 3        |
| <b>Polymyxin B</b> | Study of subretinally injected SAR439483 administered in patients with Leber congenital amaurosis caused by biallelic mutations in GUCY2D                          | July 2019      | December 2021  | X | Phase 1/2      |
| <b>Polymyxin B</b> | Biafine cream <i>vs.</i> standard care in subjects with actinic keratosis post cryotherapy                                                                         | October 2006   | February 2008  |   | Phase 4        |
| <b>Polymyxin B</b> | Patients response to early switch to oral in osteomyelitis                                                                                                         | April 2014     | September 2019 | X | Early Phase 1  |
| <b>Polymyxin B</b> | Use of ointments in prevention of catheter related infections in peritoneal dialysis                                                                               | February 2006  | June 2010      |   | Phase 4        |
| <b>Polymyxin B</b> | Tacrolimus for malar edema                                                                                                                                         | October 2018   | July 2019      |   | Phase2/3       |
| <b>Polymyxin B</b> | Effect of nitroglycerin ointment on mastectomy flap necrosis                                                                                                       | August 2012    | June 2014      |   | Not applicable |



|                    |                                                                                                                                                    |                |                |   |                |
|--------------------|----------------------------------------------------------------------------------------------------------------------------------------------------|----------------|----------------|---|----------------|
| <b>Polymyxin B</b> | Cytoscopic antibiotic irrigant to reduce postoperative urinary tract infection                                                                     | April 2016     | June 2019      |   | Phase 4        |
| <b>Polymyxin B</b> | Two trabecular micro-bypass stents and postoperative travoprost to treat glaucoma subjects on two hypotensive agents                               | March 2013     | April 2019     |   | Phase 4        |
| <b>Polymyxin B</b> | Photo-activated disinfection <i>vs.</i> triple-antibiotic paste for management of necrotic young permanent anterior teeth                          | October 2016   | April 2019     |   | Not applicable |
| <b>Polymyxin B</b> | Comparison of Mepitel® Ag <i>vs.</i> antibiotic ointment used with soft cast technique for treatment of pediatric burns                            | September 2016 | December 2019  | X | Phase 4        |
| <b>Polymyxin B</b> | Tissue characterization in teeth treated with a regeneration protocol                                                                              | March 2010     | March 2014     |   | Early Phase 1  |
| <b>Polymyxin B</b> | Next science wound gel efficacy in chronic wound <i>vs.</i> standard of care                                                                       | July 2014      | September 2016 |   | Not applicable |
| <b>Polymyxin B</b> | Antibiotic ointments and cream sting after application on a minor wound after tape stripping injury                                                | March 2015     | March 2015     |   | Not applicable |
| <b>Polymyxin B</b> | 3Mixstatin, tri-antibiotic mix and simvastatin in the treatment of primary molars                                                                  | September 2018 | January 2020   | X | Not applicable |
| <b>Polymyxin B</b> | Effect of triple antibiotic paste as an intracanal medication with an anti-inflammatory drug on post-operative pain of uniradicular necrotic teeth | October 2016   | January 2018   |   | Not applicable |
| <b>Polymyxin B</b> | Suppression of postprandial monocyte activation by blueberries or docosahexaenoic acid in humans                                                   | June 2015      | November 2017  |   | Not applicable |
| <b>Polymyxin B</b> | Triple antibiotic paste, ciprofloxacin/propolis, ciprofloxacin/metronidazole,                                                                      | January        | January        |   | Phase 4        |

|                    |                                                                                                                  |                |                |   |                |
|--------------------|------------------------------------------------------------------------------------------------------------------|----------------|----------------|---|----------------|
|                    | propolis/metronidazole on revascularization process of necrotic maxillary incisors                               | 2015           | 2018           |   |                |
| <b>Polymyxin B</b> | Treatment outcome with a revascularization protocol using the triple <i>vs.</i> double antibiotic paste          | April 2009     | January 2015   |   | Early Phase 1  |
| <b>Polymyxin B</b> | Surgical site infection with 0.05% chlorhexidine compared to triple antibiotic irrigation                        | December 2015  | December 2022  | X | Not applicable |
| <b>Polymyxin B</b> | Regeneration of pulp-dentin development in teeth with necrotic pulps and immature roots                          | September 2014 | December 2019  | X | Phase 1        |
| <b>Polymyxin B</b> | Research of the application of triple antibiotic paste in primary teeth with pericpical periodontitis            | June 2013      | June 2015      |   | Not applicable |
| <b>PXL01</b>       | PXL01 <i>vs.</i> placebo to inhibit adhesion formation after flexor tendon surgery                               | December 2009  | February 2013  |   | Phase 2        |
| <b>PXL01</b>       | Local tolerability safety and pharmacokinetics of PXL01 in healthy volunteers                                    | March 2009     | April 2009     |   | Phase1         |
| <b>SGX942</b>      | SGX942 for oral mucositis treatment in patients with concomitant chemoradiation therapy for head and neck cancer | December 2017  | December 2020  | X | Phase 3        |
| <b>SGX942</b>      | Dose-escalating study of SGX942 for oral mucositis in patients with head and neck cancer                         | December 2013  | September 2016 |   | Phase 2        |
| <b>Surotomycin</b> | Multiple doses of oral surotomycin in healthy participants                                                       | July 2009      | October 2009   |   | phase 1        |
| <b>Surotomycin</b> | Single doses of oral surotomycin in healthy participants                                                         | January 2009   | March 2009     |   | Phase 1        |
| <b>Surotomycin</b> | CB-183,315 in participants with <i>Clostridium difficile</i> associated diarrhea                                 | May 2012       | March 2015     |   | Phase 3        |
| <b>Surotomycin</b> | CB-183,315 in participants with <i>Clostridium difficile</i> associated diarrhea                                 | May 2012       | August 2015    |   | Phase 3        |
